# Supplementary material for: The room-temperature structural and optical transformation of cadmium chalcogenide quantum dots triggered by reactive cations
Source: Royal Society of Chemistry journal article supplement (doi:10.1039/c1jm10248f), 2011-01-01
Supplement: c1jm10248f.pdf [file c1jm10248f.pdf]

# The room-temperature structural and optical transformation of cadmium chalcogenide quantum dots triggered by reactive cations

Shohei Taniguchi and Mark Green

## Supporting Information

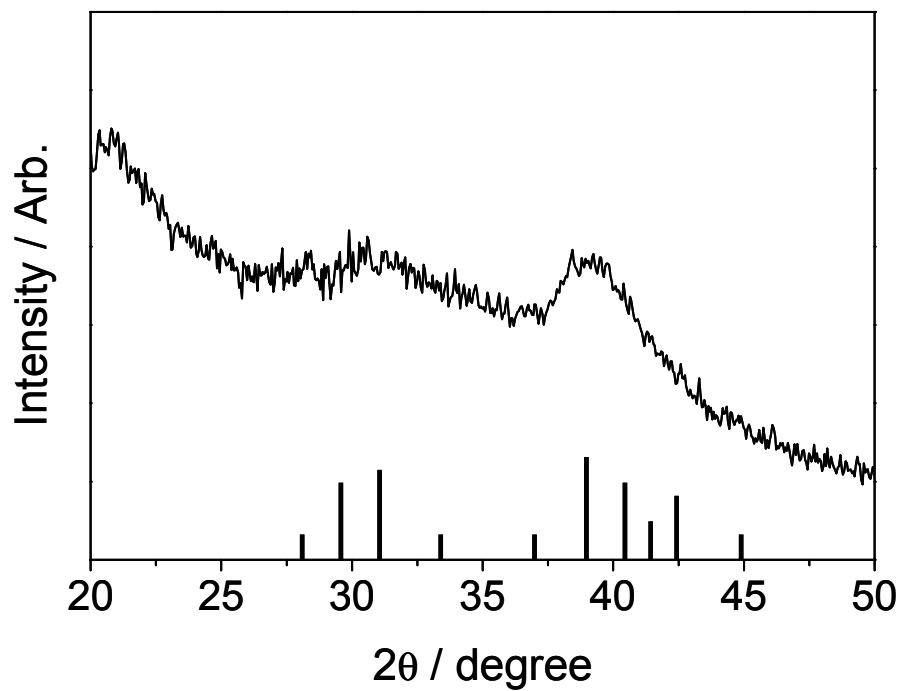

Figure S1. X-ray diffraction of Ag<sub>2</sub>Te nanoparticles. Miller indices for monoclinic Ag<sub>2</sub>Te were shown below.

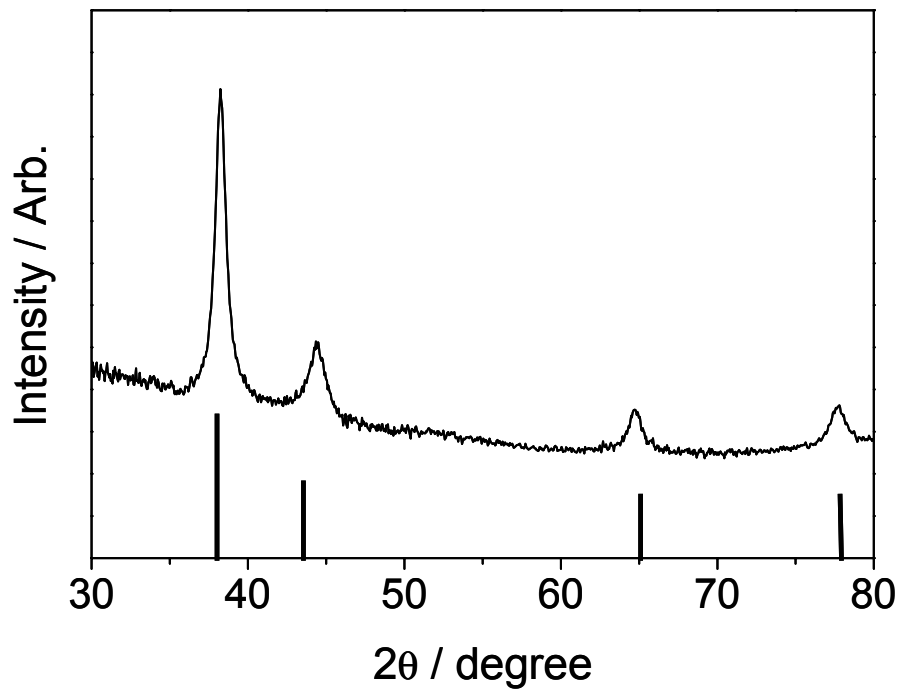

Figure S2. X-ray diffraction of gold heterostructures obtained from CdTe and gold cation. Miller indices for elemental gold (fcc) were shown below.

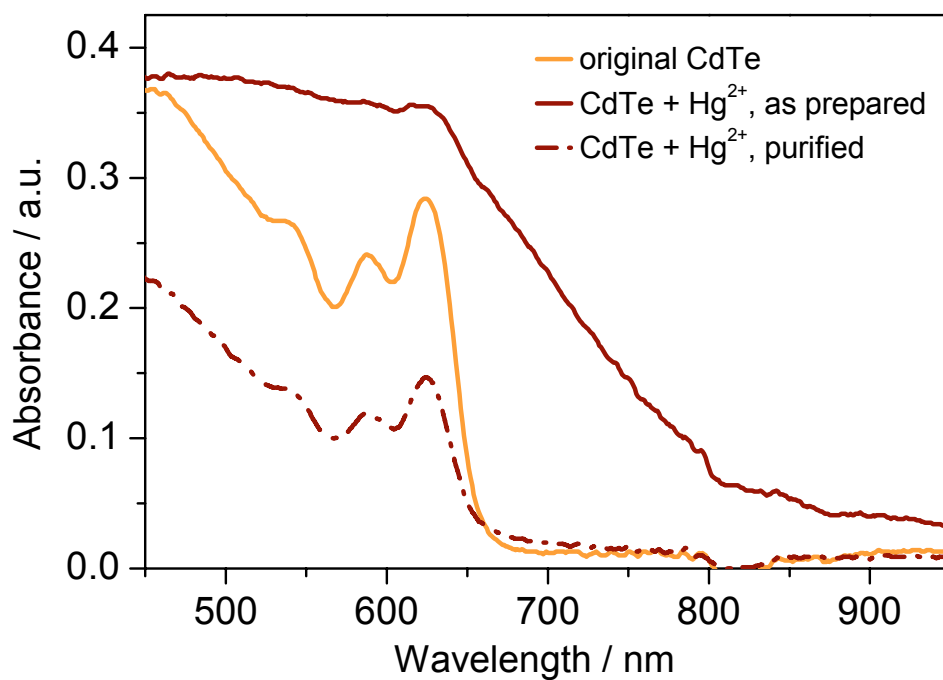

Figure S3. Change in absorption spectra of CdTe nanoparticles with stepwise addition of mercury stock solution followed by purification.
